# Supplementary figures and images for: A comparative study of dietary curcumin, nanocurcumin, and other classical amyloid-binding dyes for labeling and imaging of amyloid plaques in brain tissue of 5×-familial Alzheimer’s disease mice
Source: Springer Nature journal article supplement (doi:10.1007/s00418-016-1464-1), 2016-07-12

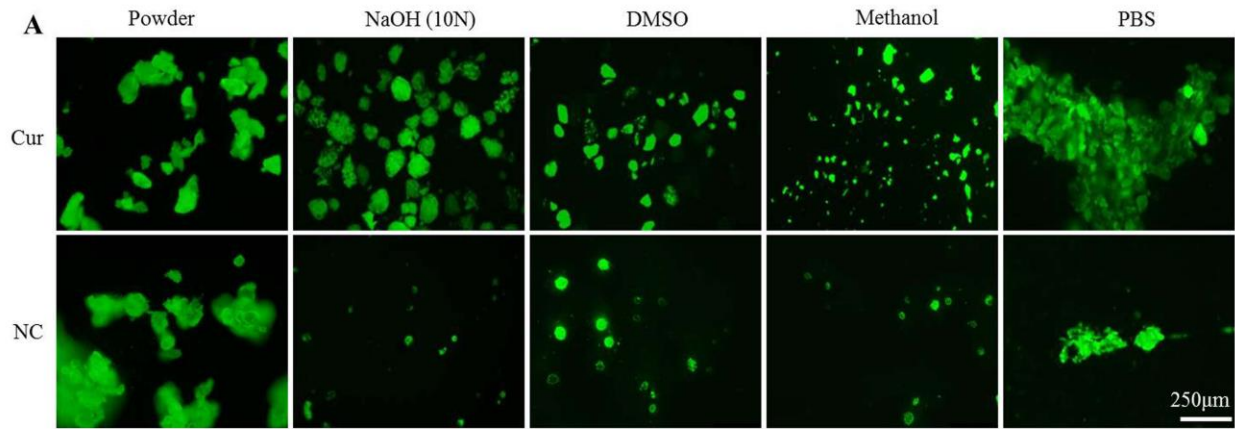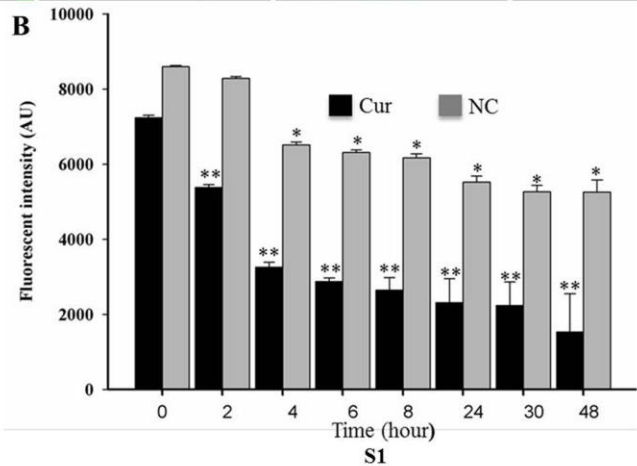

Supplement: 418_2016_1464_MOESM1_ESM.pdf [file 418_2016_1464_MOESM1_ESM.pdf]
